# Supplementary material for: High-resolution based sustainable livestock management in China
Source: Research Square preprint supplement (doi:10.21203/rs.3.rs-523982/v1), 2021-06-02
Supplement: Supplementary file 2 [file ReadMe.xlsx]

## Sheet: Sheet1
name	item	animal	unit
pigunit_all_km2.tif	pigunit	all	pigunit/km2
pigunit_beef_km2.tif	pigunit	beef	pigunit/km2
pigunit_broiler_km2.tif	pigunit	broiler	pigunit/km2
pigunit_dairy_km2.tif	pigunit	dairy	pigunit/km2
pigunit_layer_km2.tif	pigunit	layer	pigunit/km2
pigunit_pig_km2.tif	pigunit	pig	pigunit/km2
pigunit_sheep_km2.tif	pigunit	sheep	pigunit/km2
TN_all_without_sheep_t_km2.tif	N excretion	pig, diary, beef, layer&broiler	t N/km2
RN_all_without_sheep_t_km2.tif	N production	pig, diary, beef, layer&broiler	t N/km2
to_water_N_all_without_sheep.tif	N to water	pig, diary, beef, layer&broiler	t N/km2
NH3_all_without_sheep_tN_km2.tif	N in NH3	pig, diary, beef, layer&broiler	t N/km2
manure_N2O_tCO2e_all_without_sheep_km2.tif	manure_N2O	pig, diary, beef, layer&broiler	t CO2e/km2
to_cropland_N_all_without_sheep.tif	N to cropland	pig, diary, beef, layer&broiler	t N/km2
TP_all_without_sheep_t_km2.tif	P excretion	pig, diary, beef, layer&broiler	t P/km2
to_water_P_all_without_sheep_t_km2.tif	P to water	pig, diary, beef, layer&broiler	t P/km2
COD_all_without_sheep_t_km2.tif	COD	pig, diary, beef, layer&broiler	t COD/km2
to_water_COD_all_without_sheep_t_km2.tif	COD to water	pig, diary, beef, layer&broiler	t COD/km2
intestinal_CH4_tCO2e_all_without_sheep_km2.tif	intestinal CH4	pig, diary, beef, layer&broiler	tCO2e/km2
manure_CH4_tCO2e_all_without_sheep_km2.tif	manure CH4	pig, diary, beef, layer&broiler	tCO2e/km2
feed_all_without_sheep_t_km2.tif	feed	pig, diary, beef, layer&broiler	t/km2
faeces_all_without_sheep_t_km2.tif	faeces	pig, diary, beef, layer&broiler	t/km2
product_all_without_sheep_t_km2.tif	meat or egg product	pig, diary, beef, layer&broiler	t/km2
urine_all_without_sheep_t_km2.tif	urine	pig, diary, beef, layer&broiler	t/km2
TN_sheep_t_km2.tif	N excretion	sheep	t N/km2
RN_sheep_t_km2.tif	N production	sheep	t N/km2
manure_N2O_tCO2e_sheep_km2.tif	manure_N2O	sheep	tCO2e/km2
intestinal_CH4_tCO2e_sheep_km2.tif	intestinal CH4	sheep	tCO2e/km2
manure_CH4_tCO2e_sheep_km2.tif	manure CH4	sheep	tCO2e/km2
product_sheep_t_km2.tif	meat or egg product	sheep	t/km2
